# Supplementary material for: Movements of a Specialist Butterfly in Relation to Mowing Management of Its Habitat Patches
Source: MDPI journal article supplement (doi:10.3390/biology12030344), 2023-02-21
Supplement: s1 [file s1]

# Movements of a Specialist Butterfly in Relation to Mowing Management of Its Habitat Patches: Model Selection Procedure Using AIC

Miloš Popović <sup>1,2,\*</sup>, Piotr Nowicki <sup>2</sup>
<sup>1</sup> Department of Biology and Ecology, Faculty of Sciences and Mathematics, University of Niš, Višegradska 33, 18000 Niš, Serbia; mpopovic@pmf.ni.ac.rs

<sup>2</sup> Institute of Environmental Sciences, Faculty of Biology, Jagiellonian University, Gronostajowa 7, 30-387 Kraków, Poland; piotr.nowicki@uj.edu.pl

\* Correspondence: mpopovic@pmf.ni.ac.rs

**Table S1.** Results of the model selection procedure based on Akaike Information Criterion (AIC) for binomial family of generalised linear mixed models explaining dispersal (emigration) probability of *Phengaris teleius*. The predictors included meadow mowing regime (mown, recovered and unmown), butterfly sex (males and females), estimated population size, patch connectivity and patch area as well as the interaction of the last three variables.

| Model structure                                                                                                                                                                                                                     | AIC           |
|-------------------------------------------------------------------------------------------------------------------------------------------------------------------------------------------------------------------------------------|---------------|
| Dispersal probability ~ Mowing regime + Butterfly sex + Population size + Patch connectivity + Patch area + Population size × Patch connectivity × Patch area + Population size × Patch connectivity                                | 1632.1        |
| Dispersal probability ~ Mowing regime + Butterfly sex + Population size + Patch connectivity + Patch area + Population size × Patch connectivity × Patch area + Population size × Patch connectivity + Population size × Patch area | 1632.2        |
| <b>Dispersal probability ~ Mowing regime + Butterfly sex + Population size + Patch connectivity + Population size × Patch connectivity × Patch area + Population size × Patch connectivity</b>                                      | <b>1632.7</b> |
| Dispersal probability ~ Mowing regime + Butterfly sex + Population size + Patch connectivity + Population size × Patch connectivity × Patch area + Population size × Patch connectivity + Population size × Patch area              | 1634.1        |
| Dispersal probability ~ Butterfly sex + Population size + Patch connectivity + Patch area + Population size × Patch connectivity × Patch area + Population size × Patch connectivity + Population size × Patch area                 | 1634.4        |
| Dispersal probability ~ Mowing regime + Butterfly sex + Population size + Patch connectivity + Patch area + Population size × Patch connectivity                                                                                    | 1635.0        |
| Dispersal probability ~ Mowing regime + Butterfly sex + Population size + Patch connectivity + Patch area + Patch Population size × Patch connectivity + Population size × Patch area                                               | 1636.7        |
| Dispersal probability ~ Mowing regime + Butterfly sex + Population size + Patch connectivity + Patch area + Population size × Patch area                                                                                            | 1637.0        |
| Dispersal probability ~ Butterfly sex + Population size + Patch connectivity + Patch area + Population size × Patch connectivity × Patch area + Population size × Patch connectivity                                                | 1637.5        |
| Dispersal probability ~ Butterfly sex + Population size + Patch connectivity + Patch area + Population size × Patch connectivity                                                                                                    | 1638.5        |
| Dispersal probability ~ Mowing regime + Butterfly sex + Population size + Patch connectivity + Patch area + Population size × Patch connectivity × Patch area + Population size × Patch area                                        | 1638.5        |

Only the supported models, i.e. those differing from the lowest AIC by less than 7 are shown. The selected model is shown in bold.

**Table S2.** Results of the model selection procedure based on Akaike Information Criterion (AIC) for gamma family of generalised linear mixed models explaining dispersal distances of *Phengaris teleius*. The predictors included meadow mowing regime (mown, recovered and unmown), butterfly sex (males and females), estimated population size, patch connectivity and patch area.

| Model structure                                                                                                                                                                                | AIC           |
|------------------------------------------------------------------------------------------------------------------------------------------------------------------------------------------------|---------------|
| <b>Dispersal distance ~ Mowing regime + Butterfly sex + Patch area</b>                                                                                                                         | <b>5307.6</b> |
| Dispersal distance ~ Mowing regime + Butterfly sex + Patch area + Population size × Patch connectivity × Patch area                                                                            | 5308.1        |
| Dispersal distance ~ Mowing regime + Butterfly sex + Population size + Population size × Patch connectivity × Patch area                                                                       | 5308.2        |
| Dispersal distance ~ Mowing regime + Butterfly sex + Patch area + Population size × Patch area                                                                                                 | 5308.6        |
| Dispersal distance ~ Mowing regime + Butterfly sex + Population size + Population size × Patch connectivity × Patch area + Population size × Patch connectivity                                | 5308.9        |
| Dispersal distance ~ Mowing regime + Butterfly sex + Population size + Patch area                                                                                                              | 5309.0        |
| Dispersal distance ~ Mowing regime + Butterfly sex + Patch area + Population size × Patch connectivity                                                                                         | 5309.3        |
| Dispersal distance ~ Mowing regime + Butterfly sex + Patch connectivity + Patch area                                                                                                           | 5309.4        |
| Dispersal distance ~ Mowing regime + Butterfly sex + Population size + Population size × Patch connectivity × Patch area + Population size × Patch area                                        | 5309.6        |
| Dispersal distance ~ Mowing regime + Butterfly sex + Population size + Population size × Patch area                                                                                            | 5309.6        |
| Dispersal distance ~ Mowing regime + Butterfly sex + Population size + Patch connectivity + Population size × Patch connectivity × Patch area                                                  | 5309.7        |
| Dispersal distance ~ Mowing regime + Butterfly sex + Population size + Patch area + Population size × Patch connectivity × Patch area                                                          | 5309.8        |
| Dispersal distance ~ Mowing regime + Butterfly sex                                                                                                                                             | 5309.9        |
| Dispersal distance ~ Mowing regime + Butterfly sex + Population size × Patch connectivity × Patch area                                                                                         | 5309.9        |
| Dispersal distance ~ Mowing regime + Butterfly sex + Patch connectivity + Patch area + Population size × Patch connectivity × Patch area                                                       | 5310.1        |
| Dispersal distance ~ Mowing regime + Butterfly sex + Patch area + Population size × Patch connectivity × Patch area + Population size × Patch area                                             | 5310.1        |
| Dispersal distance ~ Mowing regime + Butterfly sex + Patch area + Population size × Patch connectivity × Patch area + Population size × Patch connectivity                                     | 5310.1        |
| Dispersal distance ~ Mowing regime + Butterfly sex + Patch area + Population size × Patch connectivity + Population size × Patch area                                                          | 5310.4        |
| Dispersal distance ~ Mowing regime + Butterfly sex + Patch connectivity + Patch area + Population size × Patch area                                                                            | 5310.4        |
| Dispersal distance ~ Mowing regime + Butterfly sex + Population size + Patch area + Population size × Patch area                                                                               | 5310.4        |
| Dispersal distance ~ Mowing regime + Butterfly sex + Patch connectivity + Patch area + Population size × Patch connectivity                                                                    | 5310.6        |
| Dispersal distance ~ Mowing regime + Butterfly sex + Population size + Patch connectivity + Population size × Patch connectivity × Patch area + Population size × Patch connectivity           | 5310.7        |
| Dispersal distance ~ Mowing regime + Butterfly sex + Population size + Patch area + Population size × Patch connectivity × Patch area + Population size × Patch connectivity                   | 5310.8        |
| Dispersal distance ~ Mowing regime + Butterfly sex + Population size + Patch connectivity + Patch area                                                                                         | 5310.8        |
| Dispersal distance ~ Mowing regime + Butterfly sex + Population size + Population size × Patch connectivity × Patch area + Population size × Patch connectivity + Population size × Patch area | 5310.8        |
| Dispersal distance ~ Mowing regime + Butterfly sex + Patch connectivity + Population size × Patch connectivity × Patch area                                                                    | 5310.9        |
| Dispersal distance ~ Mowing regime + Butterfly sex + Population size + Patch area + Population size × Patch connectivity                                                                       | 5311.0        |
| Dispersal distance ~ Mowing regime + Butterfly sex + Patch connectivity                                                                                                                        | 5311.3        |
| Dispersal distance ~ Mowing regime + Butterfly sex + Population size × Patch area                                                                                                              | 5311.3        |
| Dispersal distance ~ Mowing regime + Butterfly sex + Population size + Patch connectivity + Population size × Patch connectivity × Patch area + Population size × Patch area                   | 5311.3        |

[illegible]

---

|                                                                                                                                                                                                                                  |        |
|----------------------------------------------------------------------------------------------------------------------------------------------------------------------------------------------------------------------------------|--------|
| Population size × Patch connectivity × Patch area + Population size × Patch area                                                                                                                                                 |        |
| Dispersal distance ~ Mowing regime + Butterfly sex + Patch connectivity + Population size × Patch connectivity × Patch area + Population size × Patch connectivity + Population size × Patch area                                | 5313.9 |
| Dispersal distance ~ Mowing regime + Butterfly sex + Patch connectivity + Patch area + Population size × Patch connectivity × Patch area + Population size × Patch connectivity + Population size × Patch area                   | 5314.0 |
| Dispersal distance ~ Mowing regime + Butterfly sex + Population size + Patch connectivity + Patch area + Population size × Patch connectivity + Population size × Patch area                                                     | 5314.2 |
| Dispersal distance ~ Mowing regime + Butterfly sex + Population size + Patch connectivity + Patch area + Population size × Patch connectivity × Patch area + Population size × Patch connectivity + Population size × Patch area | 5314.3 |

---

Only the supported models, i.e. those differing from the lowest AIC by less than 7 are shown. The selected model is shown in bold.

**Table S3.** Results of the model selection procedure based on Akaike Information Criterion (AIC) for gamma family of generalised linear mixed models explaining displacement distances of *Phengaris teleius*. The predictors included meadow mowing regime (mown, recovered and unmown), butterfly sex (males and females), estimated population size, patch connectivity and patch area.

| Model structure                                                                                                                                                                                        | AIC            |
|--------------------------------------------------------------------------------------------------------------------------------------------------------------------------------------------------------|----------------|
| <b>Displacement distance ~ Butterfly sex + Population size + Population size × Patch area</b>                                                                                                          | <b>11154.1</b> |
| Displacement distance ~ Butterfly sex + Population size + Population size × Patch connectivity × Patch area + Population size × Patch area                                                             | 11154.7        |
| Displacement distance ~ Butterfly sex + Population size + Patch area + Population size × Patch area                                                                                                    | 11155.5        |
| Displacement distance ~ Butterfly sex + Population size + Population size × Patch connectivity + Population size × Patch area                                                                          | 11156.1        |
| Displacement distance ~ Butterfly sex + Population size + Patch connectivity + Population size × Patch area                                                                                            | 11156.1        |
| Displacement distance ~ Butterfly sex + Patch connectivity + Population size × Patch connectivity:Patch area + Population size × Patch connectivity + Population size × Patch area                     | 11156.5        |
| Displacement distance ~ Butterfly sex + Population size × Patch connectivity × Patch area + Population size × Patch connectivity + Population size × Patch area                                        | 11156.5        |
| Displacement distance ~ Mowing regime + Butterfly sex + Population size + Population size × Patch area                                                                                                 | 11156.6        |
| Displacement distance ~ Butterfly sex + Population size + Patch connectivity + Population size × Patch connectivity × Patch area + Population size × Patch area                                        | 11156.7        |
| Displacement distance ~ Butterfly sex + Population size + Patch area + Population size × Patch connectivity:Patch area + Population size × Patch area                                                  | 11156.7        |
| Displacement distance ~ Butterfly sex + Population size + Population size × Patch connectivity × Patch area + Population size × Patch connectivity + Population size × Patch area                      | 11156.7        |
| Displacement distance ~ Butterfly sex + Population size × Patch connectivity × Patch area + Population size × Patch area                                                                               | 11156.9        |
| Displacement distance ~ Butterfly sex + Population size + Patch connectivity + Patch area + Population size × Patch area                                                                               | 11156.9        |
| Displacement distance ~ Butterfly sex + Patch area + Population size × Patch connectivity × Patch area + Population size × Patch area                                                                  | 11156.9        |
| Displacement distance ~ Butterfly sex + Population size + Patch area + Population size × Patch connectivity + Population size × Patch area                                                             | 11157.0        |
| Displacement distance ~ Mowing regime + Butterfly sex + Population size + Population size × Patch connectivity × Patch area + Population size × Patch area                                             | 11157.1        |
| Displacement distance ~ Butterfly sex + Patch connectivity + Population size × Patch connectivity + Population size × Patch area                                                                       | 11157.2        |
| Displacement distance ~ Butterfly sex + Patch connectivity + Patch area + Population size × Patch connectivity + Population size × Patch area                                                          | 11157.5        |
| Displacement distance ~ Butterfly sex + Population size × Patch connectivity + Population size × Patch area                                                                                            | 11157.6        |
| Displacement distance ~ Butterfly sex + Patch area + Population size × Patch connectivity × Patch area + Population size × Patch connectivity + Population size × Patch area                           | 11157.6        |
| Displacement distance ~ Butterfly sex + Population size + Patch connectivity + Population size × Patch connectivity + Population size × Patch area                                                     | 11157.8        |
| Displacement distance ~ Mowing regime + Butterfly sex + Population size + Patch area + Population size × Patch area                                                                                    | 11158.0        |
| Displacement distance ~ Mowing regime + Butterfly sex + Population size × Patch connectivity × Patch area + Population size × Patch area                                                               | 11158.1        |
| Displacement distance ~ Butterfly sex + Patch connectivity + Population size × Patch connectivity × Patch area + Population size × Patch area                                                          | 11158.1        |
| Displacement distance ~ Butterfly sex + Patch connectivity + Patch area + Population size × Patch connectivity × Patch area + Population size × Patch connectivity + Population size × Patch area      | 11158.1        |
| Displacement distance ~ Butterfly sex + Population size + Patch connectivity + Population size × Patch connectivity × Patch area + Population size × Patch connectivity + Population size × Patch area | 11158.4        |

[illegible]

---

|                                                                                                                                                                                                                   |         |
|-------------------------------------------------------------------------------------------------------------------------------------------------------------------------------------------------------------------|---------|
| area + Population size × Patch connectivity × Patch area + Population size × Patch area                                                                                                                           |         |
| Displacement distance ~ Mowing regime + Butterfly sex + Population size + Patch area + Population size<br>× Patch connectivity × Patch area + Population size × Patch connectivity + Population size × Patch area | 11160.9 |
| Displacement distance ~ Butterfly sex + Population size + Patch connectivity + Population size × Patch<br>connectivity × Patch area + Population size × Patch connectivity                                        | 11160.9 |

---

Only the supported models, i.e. those differing from the lowest AIC by less than 7 are shown. The selected model is shown in bold.

**Table S4.** Results of the model selection procedure based on Akaike Information Criterion (AIC) for linear mixed models explaining survival of *Phengaris teleius*. The predictors included meadow mowing regime (mown, recovered and unmown), butterfly sex (males and females), patch connectivity and patch area. There was only a single AIC supported model.

| Model structure     | AIC           |
|---------------------|---------------|
| <b>Survival ~ 1</b> | <b>-117.1</b> |

Only the supported models, i.e. those differing from the lowest AIC by less than 7 are shown. The selected model is shown in bold.

**Table S5.** Results of the model selection procedure based on Akaike Information Criterion (AIC) for linear mixed models explaining capture probability of *Phengaris teleius*, along with estimates of model parameters. The predictors included meadow mowing regime (mown, recovered and unmown), butterfly sex (males and females), patch connectivity and patch area.

| Model structure                                       | AIC           |
|-------------------------------------------------------|---------------|
| <b>Capture probability ~ 1</b>                        | <b>-64.36</b> |
| Capture probability ~ Patch area                      | -61.96        |
| Capture probability ~ Butterfly sex                   | -57.57        |
| Capture probability ~ Patch connectivity              | -57.49        |
| Capture probability ~ Patch area × Patch connectivity | -57.43        |

Only the supported models, i.e. those differing from the lowest AIC by less than 7 are shown. The selected model is shown in bold.

**Table S6.** Results of the model selection procedure based on Akaike Information Criterion (AIC) for linear mixed models explaining local population size of *Phengaris teleius*. The predictors included meadow mowing regime (mown, recovered and unmown), patch connectivity and patch area. There was only a single AIC supported model.

| Model structure                                                                                            | AIC           |
|------------------------------------------------------------------------------------------------------------|---------------|
| <b>Population size ~ Mowing regime + Patch area + Patch connectivity + Patch area × Patch connectivity</b> | <b>4196.7</b> |

Only the supported models, i.e. those differing from the lowest AIC by less than 7 are shown. The selected model is shown in bold.
